# Supplementary material for: Effects of healthcare system transformations spurred by the COVID-19 pandemic on management of stroke and STEMI: a registry-based cohort study in France
Source: PubMed Central journal article supplement — BMJ Open. 2022 Sep 21;12(9):e061025. doi: 10.1136/bmjopen-2022-061025 (PMC9494013; doi:10.1136/bmjopen-2022-061025), 2022-09-21
Supplement: bmjopen-2022-061025supp001.pdf [file bmjopen-2022-061025supp001.pdf]

## Supplementary material 1.

### Method of the scoping review

The method of the scoping review was conducted to retrieve the structural reorganisations implemented in care structures to deal with the first wave of the COVID-19 pandemic in the acute management of stroke or STEMI.

Two categories of information sources were systematically explored:

- **Written English or French-language documents**

All written English or French-language documents published between January and December 2020 were retrieved without geographical limitation:

- scientific articles analysing the impact of the first wave of Covid-19 pandemic on stroke and STEMI management;
- government reports, professional stroke or STEMI guidelines providing guidance on the management of stroke and STEMI patients during the COVID-19 pandemic;
- published feedback on hospital management of stroke and STEMI patients during the first wave of the COVID-19 pandemic.

The following sources were consulted:

- computerised bibliographic database “Pubmed” and “Scopus” with the following algorithm TITLE-ABS-KEY (Pathway OR organisation OR use of care) AND (COVID-19 OR SARS-CoV-2) AND (stroke OR STEMI) AND (effect OR effectiveness OR impact);
- “Google” search engine with the keywords "Organisations", "hospital unit", or "hospital", "COVID-19";
- French Health Ministry (Ministère des solidarités et de la santé) website in search of reports on organisational recommendations for hospital in the management of the Covid-19 pandemic;
- French societies of cardiology, emergency medicine, and neurology (Société Française de Neuro-Vasculaire, Société Française de Cardiologie, Société Française de Médecine d’Urgence) websites in search of clinical recommendations in the management of stroke and STEMI patients in the context of the Covid-19 pandemic.

After a pre-selection on the title and the abstract, the complete reading of the articles allowed to filter out the articles that did not describe any structural organisations. Then, organisational data was independently collected on a dedicated collection grid. If necessary, a common reading was carried out.

- **Structured telephone interviews**

In December 2020, structured telephone interviews were conducted with healthcare professionals involved in stroke or STEMI management in hospitals in the Aquitaine Region, to question them on the organisations they had to cope with during the first wave of the pandemic in stroke and STEMI patients’ management. Among the 16 approached professionals, eight (2 nurses, 2 emergency physicians, 2 cardiologists, and 2 neurologists) from 8 hospitals accepted to participate. Questions asked were: "What reorganisations were implemented during the first wave?"; "Have you been provided with facilities for this reorganisation?"; "Have you received help from professionals in other services?"; "Did you expand/reduce your capacity? ". Responses were transcribed as the interview progressed. Each verbatim was reviewed by the two interviewers in collaboration with the AVICOVID principal investigator.
