# Supplementary material for: Effects of healthcare system transformations spurred by the COVID-19 pandemic on management of stroke and STEMI: a registry-based cohort study in France
Source: PubMed Central journal article supplement — BMJ Open. 2022 Sep 21;12(9):e061025. doi: 10.1136/bmjopen-2022-061025 (PMC9494013; doi:10.1136/bmjopen-2022-061025), 2022-09-21
Supplement: bmjopen-2022-061025supp002.pdf [file bmjopen-2022-061025supp002.pdf]

## Supplementary material 2.

### Confounding variables introduced in the stroke and STEMI final model estimating the association between reorganizations and use of care effects on care management times

| Category of variables                     | Stroke cohort Model                                                                                                                                                                            | STEMI Cohort Model                                                                                                                  |
|-------------------------------------------|------------------------------------------------------------------------------------------------------------------------------------------------------------------------------------------------|-------------------------------------------------------------------------------------------------------------------------------------|
| <b>Time</b>                               | Period (pre, per, post-wave)                                                                                                                                                                   | Period (pre, per, post-wave)                                                                                                        |
| <b>Socio-demographic characteristics</b>  | Age, gender                                                                                                                                                                                    | Age, gender                                                                                                                         |
| <b>Geographical indexes</b>               | Urbanicity, FDep15, APL MG 2018, residence-EU distance                                                                                                                                         | Urbanicity, FDep15, APL MG 2018, residence-to-cathlab distance                                                                      |
| <b>Clinical characteristics</b>           | mRS less than 1 before stroke, NIHSS at entry, previous stroke or transient ischaemic attack                                                                                                   | Diabetes mellitus, history of coronary artery disease or of STEMI                                                                   |
| <b>Acute care management quality</b>      | Mode of transport                                                                                                                                                                              | Mode of transport                                                                                                                   |
| <b>Structural characteristics of care</b> | call to the emergency services activity during care, care during on-call activity, presence of stroke unit, availability of MRI 24 hours a day, presence of interventional neuroradiology unit | call to the emergency services activity during care, care during on-call activity, cathlab hospital status, FMC-to-cathlab distance |

APL MG 2018=potential accessibility indicator to general practitioners; EU=emergency unit; FDep15=deprivation index; FMC=first medical contact; MRI=magnetic resonance imaging; mRS=modified Rankin Scale; NIHSS=National Institute of Health Stroke Score; STEMI=segment elevation myocardial infarction.

*Created by the authors*
