# Supplementary material for: Effects of healthcare system transformations spurred by the COVID-19 pandemic on management of stroke and STEMI: a registry-based cohort study in France
Source: PubMed Central journal article supplement — BMJ Open. 2022 Sep 21;12(9):e061025. doi: 10.1136/bmjopen-2022-061025 (PMC9494013; doi:10.1136/bmjopen-2022-061025), 2022-09-21
Supplement: bmjopen-2022-061025supp003.pdf [file bmjopen-2022-061025supp003.pdf]

## Supplementary material 3.

## Description of the stroke cohort study sample (N=6436)

|                                                      | Global<br>(N=6436) |              | pre-wave<br>(N=4140) |              | per-wave<br>(N=1080) |              | post-wave<br>(N=1216) |              |
|------------------------------------------------------|--------------------|--------------|----------------------|--------------|----------------------|--------------|-----------------------|--------------|
|                                                      | n                  | (%)          | n                    | (%)          | n                    | (%)          | n                     | (%)          |
| <b>Patient socio-demographic characteristics</b>     |                    |              |                      |              |                      |              |                       |              |
| <b>Gender</b>                                        | 6436               |              | 4140                 |              | 1080                 |              | 1216                  |              |
| Male                                                 | 3533               | (54.9)       | 2264                 | (54.7)       | 589                  | (54.5)       | 680                   | (55.9)       |
| Female                                               | 2903               | (45.1)       | 1876                 | (45.3)       | 491                  | (45.5)       | 536                   | (44.1)       |
| <b>Age</b>                                           | 6436               |              | 4140                 |              | 1080                 |              | 1216                  |              |
| Median [IQR]                                         | 78                 | [68;87]      | 79                   | [69;87]      | 77                   | [68;86]      | 76                    | [68;85]      |
| <b>Urbanicity</b>                                    | 6153               |              | 3882                 |              | 1072                 |              | 1199                  |              |
| Urban                                                | 4451               | (72.3)       | 2816                 | (72.5)       | 786                  | (73.3)       | 849                   | (70.8)       |
| Rural                                                | 1702               | (27.7)       | 1066                 | (27.5)       | 286                  | (26.7)       | 350                   | (29.2)       |
| <i>Missing values</i>                                | 283                |              | 258                  |              | 8                    |              | 17                    |              |
| <b>Fdep15</b>                                        | 6145               |              | 3878                 |              | 1070                 |              | 1197                  |              |
| Median [IQR]                                         | 0.10               | [-0.96;1.14] | 0.10                 | [-1.02;1.22] | -0.01                | [-0.98;1.11] | 0.08                  | [-0.88;1.11] |
| <i>Missing values</i>                                | 291                |              | 262                  |              | 10                   |              | 19                    |              |
| <b>APL MG 2018</b>                                   | 6171               |              | 3891                 |              | 1076                 |              | 1204                  |              |
| Median [IQR]                                         | 4.3                | [3.4;5.0]    | 4.3                  | [3.4;5.0]    | 4.3                  | [3.4;5.0]    | 4.2                   | [3.4;5.1]    |
| <i>Missing values</i>                                | 265                |              | 249                  |              | 4                    |              | 12                    |              |
| <b>Residence-EU distance (km)</b>                    | 6179               |              | 3897                 |              | 1077                 |              | 1205                  |              |
| Median [IQR]                                         | 17                 | [6;32]       | 17                   | [6;33]       | 16                   | [5;28]       | 18                    | [7;34]       |
| <i>Missing values</i>                                | 257                |              | 243                  |              | 3                    |              | 11                    |              |
| <b>Patient clinical characteristics</b>              |                    |              |                      |              |                      |              |                       |              |
| <b>Stroke type</b>                                   | 6436               |              | 4140                 |              | 1080                 |              | 1216                  |              |
| Ischaemic                                            | 5669               | (88.1)       | 3617                 | (87.4)       | 941                  | (87.1)       | 1111                  | (91.4)       |
| Haemorrhagic                                         | 767                | (11.9)       | 523                  | (12.6)       | 139                  | (12.9)       | 105                   | (8.6)        |
| <b>Coronary artery disease</b>                       | 6436               |              | 4140                 |              | 1080                 |              | 1216                  |              |
| Absence                                              | 5877               | (91.3)       | 3778                 | (91.3)       | 987                  | (91.4)       | 1112                  | (91.4)       |
| Presence                                             | 559                | (8.7)        | 362                  | (8.7)        | 93                   | (8.6)        | 104                   | (8.6)        |
| <b>Previous STEMI</b>                                | 6436               |              | 4140                 |              | 1080                 |              | 1216                  |              |
| Absence                                              | 6057               | (94.1)       | 3886                 | (93.9)       | 1017                 | (94.2)       | 1154                  | (94.9)       |
| Presence                                             | 379                | (5.9)        | 254                  | (6.1)        | 63                   | (5.8)        | 62                    | (5.1)        |
| <b>Previous stroke or transient ischaemic attack</b> | 6436               |              | 4140                 |              | 1080                 |              | 1216                  |              |
| Absence                                              | 5166               | (80.3)       | 3305                 | (79.8)       | 882                  | (81.7)       | 979                   | (80.5)       |
| Presence                                             | 1270               | (19.7)       | 835                  | (20.2)       | 198                  | (18.3)       | 237                   | (19.5)       |
| <b>Diabetes mellitus</b>                             | 6436               |              | 4140                 |              | 1080                 |              | 1216                  |              |
| Absence                                              | 5198               | (80.8)       | 3352                 | (81.0)       | 894                  | (82.8)       | 952                   | (78.3)       |
| Presence                                             | 1238               | (19.2)       | 788                  | (19.0)       | 186                  | (17.2)       | 264                   | (21.7)       |
| <b>Hypertension</b>                                  | 6436               |              | 4140                 |              | 1080                 |              | 1216                  |              |
| Absence                                              | 2419               | (37.6)       | 1538                 | (37.1)       | 437                  | (40.5)       | 444                   | (36.5)       |
| Presence                                             | 4017               | (62.4)       | 2602                 | (62.9)       | 643                  | (59.5)       | 772                   | (63.5)       |
| <b>Dyslipidemia</b>                                  | 6436               |              | 4140                 |              | 1080                 |              | 1216                  |              |
| Absence                                              | 4618               | (71.8)       | 2973                 | (71.8)       | 786                  | (72.8)       | 859                   | (70.6)       |
| Presence                                             | 1818               | (28.2)       | 1167                 | (28.2)       | 294                  | (27.2)       | 357                   | (29.4)       |
| <b>Smoking</b>                                       | 6436               |              | 4140                 |              | 1080                 |              | 1216                  |              |
| Absence                                              | 5103               | (79.3)       | 3290                 | (79.5)       | 846                  | (78.3)       | 967                   | (79.5)       |
| Presence                                             | 1333               | (20.7)       | 850                  | (20.5)       | 234                  | (21.7)       | 249                   | (20.5)       |
| <b>Atheroma of the supra-aortic arteris</b>          | 6436               |              | 4140                 |              | 1080                 |              | 1216                  |              |
| Absence                                              | 6213               | (96.5)       | 4015                 | (97.0)       | 1027                 | (95.1)       | 1171                  | (96.3)       |
| Presence                                             | 223                | (3.5)        | 125                  | (3.0)        | 53                   | (4.9)        | 45                    | (3.7)        |
| <b>Peripheral artery disease</b>                     | 6436               |              | 4140                 |              | 1080                 |              | 1216                  |              |
| Absence                                              | 6144               | (95.5)       | 3959                 | (95.6)       | 1023                 | (94.7)       | 1162                  | (95.6)       |
| Presence                                             | 292                | (4.5)        | 181                  | (4.4)        | 57                   | (5.3)        | 54                    | (4.4)        |
| <b>Atrial fibrillation</b>                           | 6436               |              | 4140                 |              | 1080                 |              | 1216                  |              |
| Absence                                              | 5348               | (83.1)       | 3432                 | (82.9)       | 885                  | (81.9)       | 1031                  | (84.8)       |
| Presence                                             | 1088               | (16.9)       | 708                  | (17.1)       | 195                  | (18.1)       | 185                   | (15.2)       |
| <b>Cardiac failure</b>                               | 6436               |              | 4140                 |              | 1080                 |              | 1216                  |              |
| Absence                                              | 6114               | (95.0)       | 3934                 | (95.0)       | 1021                 | (94.5)       | 1159                  | (95.3)       |
| Presence                                             | 322                | (5.0)        | 206                  | (5.0)        | 59                   | (5.5)        | 57                    | (4.7)        |
| <b>Psychiatry</b>                                    | 6436               |              | 4140                 |              | 1080                 |              | 1216                  |              |
| Absence                                              | 5759               | (89.5)       | 3672                 | (88.7)       | 988                  | (91.5)       | 1099                  | (90.4)       |
| Presence                                             | 677                | (10.5)       | 468                  | (11.3)       | 92                   | (8.5)        | 117                   | (9.6)        |
| <b>mRS less than 1 before stroke</b>                 | 6436               |              | 4140                 |              | 1080                 |              | 1216                  |              |
| No                                                   | 961                | (14.9)       | 660                  | (15.9)       | 153                  | (14.2)       | 148                   | (12.2)       |
| Yes                                                  | 3709               | (57.6)       | 2292                 | (55.4)       | 673                  | (62.3)       | 744                   | (61.2)       |
| Unknown                                              | 1766               | (27.4)       | 1188                 | (28.7)       | 254                  | (23.5)       | 324                   | (26.6)       |
| <b>NIHSS at entry [0-6]</b>                          | 6436               |              | 4140                 |              | 1080                 |              | 1216                  |              |
| Median [IQR]                                         | 3489               | (54.2)       | 2185                 | (52.8)       | 607                  | (56.2)       | 697                   | (57.3)       |

|                                                                                              |      |        |      |        |      |        |      |        |
|----------------------------------------------------------------------------------------------|------|--------|------|--------|------|--------|------|--------|
| [7-16]                                                                                       | 1128 | (17.5) | 749  | (18.1) | 184  | (17)   | 195  | (16.0) |
| [17-42]                                                                                      | 761  | (11.8) | 522  | (12.6) | 110  | (10.2) | 129  | (10.6) |
| Unknown                                                                                      | 1058 | (16.4) | 684  | (16.5) | 179  | (16.6) | 195  | (16.0) |
| <b>Structural characteristics of care</b>                                                    |      |        |      |        |      |        |      |        |
| <b>Calls to emergency services activity during care (intensity of daily number of calls)</b> | 6436 |        | 4140 |        | 1080 |        | 1216 |        |
| Not high                                                                                     | 899  | (14.0) | 608  | (14.7) | 140  | (13)   | 151  | (12.4) |
| Moderate                                                                                     | 1948 | (30.3) | 1268 | (30.6) | 264  | (24.4) | 416  | (34.2) |
| High                                                                                         | 1184 | (18.4) | 669  | (16.2) | 303  | (28.1) | 212  | (17.4) |
| Not concerned (no calls to emergency services)                                               | 2405 | (37.4) | 1595 | (38.5) | 373  | (34.5) | 437  | (35.9) |
| <b>Care during on-call activity</b>                                                          | 6411 |        | 4122 |        | 1080 |        | 1209 |        |
| Monday-Friday [8h-18h30]                                                                     | 3351 | (52.3) | 2178 | (52.8) | 565  | (52.3) | 608  | (50.3) |
| Monday-Friday [18h30-20h]                                                                    | 338  | (5.3)  | 212  | (5.1)  | 55   | (5.1)  | 71   | (5.9)  |
| Week-end and holiday [8h-20h]                                                                | 1328 | (20.7) | 829  | (20.1) | 233  | (21.6) | 266  | (22.0) |
| Night [20h-8h]                                                                               | 1394 | (21.7) | 903  | (21.9) | 227  | (21.0) | 264  | (21.8) |
| Missing values                                                                               | 25   |        | 18   |        | 0    |        | 7    |        |
| <b>EU hospital status</b>                                                                    | 6436 |        | 4140 |        | 1080 |        | 1216 |        |
| University hospital                                                                          | 2441 | (37.9) | 1654 | (40.0) | 348  | (32.2) | 439  | (36.1) |
| General hospital                                                                             | 3879 | (60.3) | 2410 | (58.2) | 715  | (66.2) | 754  | (62.0) |
| Private hospital                                                                             | 116  | (1.8)  | 76   | (1.8)  | 17   | (1.6)  | 23   | (1.9)  |
| <b>Availability of MRI 24 hours a day</b>                                                    | 6436 |        | 4140 |        | 1080 |        | 1216 |        |
| No                                                                                           | 1694 | (26.3) | 1061 | (25.6) | 291  | (26.9) | 342  | (28.1) |
| Yes                                                                                          | 4742 | (73.7) | 3079 | (74.4) | 789  | (73.1) | 874  | (71.9) |
| <b>Presence of stroke unit</b>                                                               | 6436 |        | 4140 |        | 1080 |        | 1216 |        |
| No                                                                                           | 1245 | (19.3) | 799  | (19.3) | 197  | (18.2) | 249  | (20.5) |
| Yes                                                                                          | 5191 | (80.7) | 3341 | (80.7) | 883  | (81.8) | 967  | (79.5) |
| <b>Presence of interventional neuroradiology unit</b>                                        | 6436 |        | 4140 |        | 1080 |        | 1216 |        |
| No                                                                                           | 3304 | (51.3) | 2102 | (50.8) | 551  | (51.0) | 651  | (53.5) |
| Yes                                                                                          | 3132 | (48.7) | 2038 | (49.2) | 529  | (49.0) | 565  | (46.5) |

APL MG 2018=potential accessibility indicator to general practitioners; EU=emergency unit;

FDep15=deprivation index; MRI=magnetic resonance imaging; mRS=modified Rankin Scale; NIHSS=National Institute of Health Stroke Score; STEMI=segment elevation myocardial infarction.

Created by the authors

## Description of the STEMI cohort study sample (N=2782)

|                                                                                  | Global<br>(N=2782) |              | Pre-wave<br>(N=1868) |              | Per-wave<br>(N=407) |              | Post-wave<br>(N=507) |              |
|----------------------------------------------------------------------------------|--------------------|--------------|----------------------|--------------|---------------------|--------------|----------------------|--------------|
|                                                                                  | n                  | (%)          | n                    | (%)          | n                   | (%)          | n                    | (%)          |
| <b>Patient socio-demographic characteristics</b>                                 |                    |              |                      |              |                     |              |                      |              |
| <b>Gender</b>                                                                    | 2782               |              | 1868                 |              | 407                 |              | 507                  |              |
| Male                                                                             | 2033               | (73.1)       | 1352                 | (72.4)       | 309                 | (75.9)       | 372                  | (73.4)       |
| Female                                                                           | 749                | (26.9)       | 516                  | (27.6)       | 98                  | (24.1)       | 135                  | (26.6)       |
| <b>Age</b>                                                                       | 2776               |              | 1865                 |              | 405                 |              | 506                  |              |
| Median [IQR]                                                                     | 65                 | [55;74]      | 65                   | [55;74]      | 65                  | [55;74]      | 64                   | [54;74]      |
| Missing values                                                                   | 6                  |              | 3                    |              | 2                   |              | 1                    |              |
| <b>Urbanicity</b>                                                                | 2543               |              | 1691                 |              | 380                 |              | 472                  |              |
| Urban                                                                            | 1843               | (72.5)       | 1221                 | (72.2)       | 277                 | (72.9)       | 345                  | (73.1)       |
| Rural                                                                            | 700                | (27.5)       | 470                  | (27.8)       | 103                 | (27.1)       | 127                  | (26.9)       |
| Missing values                                                                   | 239                |              | 177                  |              | 27                  |              | 35                   |              |
| <b>Fdep15</b>                                                                    | 2537               |              | 1690                 |              | 380                 |              | 467                  |              |
| Median [IQR]                                                                     | 0.22               | [-0.72;1.09] | 0.23                 | [-0.70;1.09] | 0.11                | [-0.89;1.11] | 0.22                 | [-0.72;1.09] |
| Missing values                                                                   | 245                |              | 178                  |              | 27                  |              | 40                   |              |
| <b>APL MG 2018</b>                                                               | 2537               |              | 1689                 |              | 380                 |              | 468                  |              |
| Median [IQR]                                                                     | 4.3                | [3.4;4.9]    | 4.3                  | [3.4;4.9]    | 4.2                 | [3.3;4.9]    | 4.4                  | [3.5;5.0]    |
| Missing values                                                                   | 245                |              | 179                  |              | 27                  |              | 39                   |              |
| <b>Residence-to-cathlab distance (km)</b>                                        | 2541               |              | 1692                 |              | 379                 |              | 470                  |              |
| Median [IQR]                                                                     | 29                 | [10;54]      | 28                   | [10;54]      | 29                  | [10;52]      | 32                   | [12;58]      |
| Missing values                                                                   | 241                |              | 176                  |              | 28                  |              | 37                   |              |
| <b>Patient clinical characteristics</b>                                          |                    |              |                      |              |                     |              |                      |              |
| <b>Coronary artery disease or STEMI history</b>                                  | 2782               |              | 1868                 |              | 407                 |              | 507                  |              |
| No                                                                               | 2031               | (73.0)       | 1342                 | (71.8)       | 317                 | (77.9)       | 372                  | (73.4)       |
| Yes                                                                              | 530                | (19.1)       | 365                  | (19.5)       | 69                  | (16.9)       | 96                   | (18.9)       |
| Unknown                                                                          | 221                | (7.9)        | 161                  | (8.6)        | 21                  | (5.2)        | 39                   | (7.7)        |
| <b>Diabetes mellitus</b>                                                         | 2782               |              | 1868                 |              | 407                 |              | 507                  |              |
| No                                                                               | 2119               | (76.2)       | 1400                 | (74.9)       | 318                 | (78.1)       | 401                  | (79.1)       |
| Yes                                                                              | 414                | (12.9)       | 290                  | (15.5)       | 59                  | (14.5)       | 65                   | (12.8)       |
| Unknown                                                                          | 249                | (9.0)        | 178                  | (9.5)        | 30                  | (7.4)        | 41                   | (8.1)        |
| <b>Dyslipidemia</b>                                                              | 2782               |              | 1868                 |              | 407                 |              | 507                  |              |
| No                                                                               | 1708               | (61.4)       | 1133                 | (60.7)       | 249                 | (61.2)       | 326                  | (64.3)       |
| Yes                                                                              | 887                | (31.9)       | 601                  | (32.2)       | 135                 | (33.2)       | 151                  | (29.8)       |
| Unknown                                                                          | 187                | (6.7)        | 134                  | (7.2)        | 23                  | (5.7)        | 30                   | (5.9)        |
| <b>Active smoking</b>                                                            | 2782               |              | 1868                 |              | 407                 |              | 507                  |              |
| No                                                                               | 1194               | (42.9)       | 787                  | (42.1)       | 183                 | (45.0)       | 224                  | (44.2)       |
| Yes                                                                              | 1163               | (41.8)       | 785                  | (42.0)       | 164                 | (40.3)       | 214                  | (42.2)       |
| Unknown                                                                          | 425                | (15.3)       | 296                  | (15.8)       | 60                  | (14.7)       | 69                   | (13.6)       |
| <b>Peripheral arterial disease</b>                                               | 2782               |              | 1868                 |              | 407                 |              | 507                  |              |
| No                                                                               | 2245               | (80.7)       | 1487                 | (79.6)       | 339                 | (83.3)       | 419                  | (82.6)       |
| Yes                                                                              | 70                 | (2.5)        | 40                   | (2.1)        | 16                  | (3.9)        | 14                   | (2.8)        |
| Unknown                                                                          | 467                | (16.8)       | 341                  | (18.3)       | 52                  | (12.8)       | 74                   | (14.6)       |
| <b>Obesity</b>                                                                   | 2782               |              | 1868                 |              | 407                 |              | 507                  |              |
| No                                                                               | 1801               | (64.7)       | 1229                 | (65.8)       | 252                 | (61.9)       | 320                  | (63.1)       |
| Yes                                                                              | 513                | (18.4)       | 332                  | (17.8)       | 87                  | (21.4)       | 94                   | (18.5)       |
| Unknown                                                                          | 468                | (16.8)       | 307                  | (16.4)       | 68                  | (16.7)       | 93                   | (18.3)       |
| <b>Familial history of coronary artery disease</b>                               | 2782               |              | 1868                 |              | 407                 |              | 507                  |              |
| No                                                                               | 2070               | (74.4)       | 1367                 | (73.2)       | 308                 | (75.7)       | 395                  | (77.9)       |
| Yes                                                                              | 455                | (16.4)       | 317                  | (17.0)       | 64                  | (15.7)       | 74                   | (14.6)       |
| Unknown                                                                          | 257                | (9.2)        | 184                  | (9.9)        | 35                  | (8.6)        | 38                   | (7.5)        |
| <b>Chronic renal failure</b>                                                     | 2782               |              | 1868                 |              | 407                 |              | 507                  |              |
| No                                                                               | 2264               | (81.4)       | 1493                 | (79.9)       | 344                 | (84.5)       | 427                  | (84.2)       |
| Yes                                                                              | 47                 | (1.7)        | 31                   | (1.7)        | 10                  | (2.5)        | 6                    | (1.2)        |
| Unknown                                                                          | 471                | (16.9)       | 344                  | (18.4)       | 53                  | (13.0)       | 74                   | (14.6)       |
| <b>Arterial hypertension</b>                                                     | 2782               |              | 1868                 |              | 407                 |              | 507                  |              |
| No                                                                               | 1278               | (45.9)       | 866                  | (46.4)       | 168                 | (41.3)       | 244                  | (48.1)       |
| Yes                                                                              | 1356               | (48.7)       | 897                  | (48.0)       | 220                 | (54.1)       | 239                  | (47.1)       |
| Unknown                                                                          | 148                | (5.3)        | 105                  | (5.6)        | 19                  | (4.7)        | 24                   | (4.7)        |
| <b>Structural characteristics of care</b>                                        |                    |              |                      |              |                     |              |                      |              |
| <b>Calls to emergency services activity (intensity of daily number of calls)</b> | 2782               |              | 1868                 |              | 407                 |              | 507                  |              |
| Not high                                                                         | 440                | (15.8)       | 303                  | (16.2)       | 63                  | (15.5)       | 74                   | (14.6)       |
| Moderate                                                                         | 1093               | (39.3)       | 744                  | (39.8)       | 143                 | (35.1)       | 206                  | (40.6)       |
| High                                                                             | 642                | (23.1)       | 399                  | (21.4)       | 127                 | (31.2)       | 116                  | (22.9)       |
| Not concerned (no calls to emergency services)                                   | 607                | (21.8)       | 422                  | (22.6)       | 74                  | (18.2)       | 111                  | (21.9)       |
| <b>Care during on-call activity</b>                                              | 2712               |              | 1821                 |              | 395                 |              | 496                  |              |

|                                        |      |        |      |        |     |        |     |        |
|----------------------------------------|------|--------|------|--------|-----|--------|-----|--------|
| Monday-Friday [8h-18h30]               | 1116 | (41.2) | 741  | (40.7) | 164 | (41.5) | 211 | (42.5) |
| Monday-Friday [18h30-20h]              | 133  | (4.9)  | 90   | (4.9)  | 21  | (5.3)  | 22  | (4.4)  |
| Week-end and holiday [8h-20h]          | 547  | (20.2) | 368  | (20.2) | 68  | (17.2) | 111 | (22.4) |
| Night [20h-8h]                         | 916  | (33.8) | 622  | (34.2) | 142 | (35.9) | 152 | (30.6) |
| <i>Missing values</i>                  | 70   |        | 47   |        | 12  |        | 11  |        |
| <b>EU hospital status</b>              | 2782 |        | 1868 |        | 407 |        | 507 |        |
| University hospital                    | 71   | (2.6)  | 48   | (2.6)  | 7   | (1.7)  | 16  | (3.2)  |
| General hospital                       | 839  | (30.2) | 564  | (30.2) | 114 | (28)   | 161 | (31.8) |
| Private hospital                       | 275  | (9.9)  | 187  | (10)   | 39  | (9.6)  | 49  | (9.7)  |
| Not concerned (not managed by EU)      | 1597 | (57.4) | 1069 | (57.2) | 247 | (60.7) | 281 | (55.4) |
| <b>Cathlab hospital status</b>         | 2782 |        | 1868 |        | 407 |        | 507 |        |
| University hospital                    | 624  | (22.4) | 417  | (22.3) | 96  | (23.6) | 111 | (21.9) |
| General hospital                       | 1015 | (36.5) | 661  | (35.4) | 154 | (37.8) | 200 | (39.4) |
| Private hospital                       | 975  | (35.0) | 666  | (35.7) | 136 | (33.4) | 173 | (34.1) |
| Not concerned (not managed by cathlab) | 168  | (6.0)  | 124  | (6.6)  | 21  | (5.2)  | 23  | (4.5)  |
| <b>FMC-to-cathlab distance (km)</b>    | 2555 |        | 1703 |        | 379 |        | 473 |        |
| Median [IQR]                           | 21   | [0;50] | 21   | [0;50] | 21  | [4;48] | 24  | [0;52] |
| <i>Missing values</i>                  | 227  |        | 165  |        | 28  |        | 34  |        |

APL MG 2018=potential accessibility indicator to general practitioners; EU=emergency unit;

FDep15=deprivation index; FMC=first medical contact; STEMI=segment elevation myocardial infarction.

*Created by the authors*
