# Supplementary material for: Effects of healthcare system transformations spurred by the COVID-19 pandemic on management of stroke and STEMI: a registry-based cohort study in France
Source: PubMed Central journal article supplement — BMJ Open. 2022 Sep 21;12(9):e061025. doi: 10.1136/bmjopen-2022-061025 (PMC9494013; doi:10.1136/bmjopen-2022-061025), 2022-09-21
Supplement: bmjopen-2022-061025supp004.pdf [file bmjopen-2022-061025supp004.pdf]

## Supplementary material 4.

### Results of the final model estimating the association between reorganisations and use of care effects on care management times: p-value of the type III global fixed effects test - Stroke cohort (N=4603)

| Variable                                                              | p-value |
|-----------------------------------------------------------------------|---------|
| <b>Hospital reorganisations</b>                                       |         |
| <i>Plan Blanc</i>                                                     | 0.372   |
| Separate COVID-19/non-COVID-19 patients pathway                       | 0.830   |
| Decrease in non-COVID-19 patients management and admission capacities | 0.532   |
| Specific access to imaging for COVID-19 patients                      | 0.658   |
| Deprogramming of non-urgent procedures or hospitalisations            | 0.752   |
| <b>Use of care</b>                                                    |         |
| Calls to emergency services                                           | 0.360   |
| <i>Interaction period x calls to emergency services</i>               | 0.039   |
| FMC                                                                   | 0.034   |
| <i>Interaction period x FMC</i>                                       | 0.807   |

Results of multivariate linear regression mixed model; variable to be explained: Y = log (EU admission-to-imaging time); results adjusted on period, age, gender, urbanicity, FDep15, APL MG 18, residence-EU distance, presence of stroke unit, MRI 24 hours a day, presence of interventional neuroradiology unit, care during on-call activity, mode of transport, calls to emergency services activity, mRS less than 1 before stroke, NIHSS at entry, previous stroke or transient ischaemic attack

APL MG 2018=potential accessibility indicator to general practitioners; EU=emergency unit;

FDep15=deprivation index; FMC=first medical contact; MRI=magnetic resonance imaging; mRS=modified Rankin Scale; NIHSS=National Institute of Health Stroke Score.

*Created by the authors*

**Results of the final model estimating the association between reorganisations and use of care effects on care management times: estimation of regression coefficients - Stroke cohort (N=4603)**

| Variable                                                              | Modalities                      | $\beta$            | p-value |                  |        |       |
|-----------------------------------------------------------------------|---------------------------------|--------------------|---------|------------------|--------|-------|
| Intercept                                                             |                                 | 4.767              | <0.001  |                  |        |       |
| <b>Hospital reorganisations</b>                                       |                                 |                    |         |                  |        |       |
| <i>Plan Blanc</i>                                                     | yes (ref : no)                  | -0.061             | 0.372   |                  |        |       |
| Separate COVID-19/non-COVID-19 patients pathway                       | yes (ref : no)                  | 0.013              | 0.830   |                  |        |       |
| Decrease in non-COVID-19 patients management and admission capacities | yes (ref : no)                  | -0.044             | 0.532   |                  |        |       |
| Specific access to imaging for COVID-19 patients                      | yes (ref : no)                  | 0.024              | 0.658   |                  |        |       |
| Deprogramming of non-urgent procedures or hospitalisations            | yes (ref : no)                  | 0.021              | 0.752   |                  |        |       |
| <b>Use of care</b>                                                    |                                 |                    |         |                  |        |       |
| Calls to emergency services                                           | yes (ref : no)                  | -0.137             | 0.087   |                  |        |       |
| <i>Interaction period x calls to emergency services</i>               | <i>pre-wave</i> no              | -                  | .       |                  |        |       |
|                                                                       | <i>pre-wave</i> yes             | -                  | .       |                  |        |       |
|                                                                       | <i>per-wave</i> no              | -                  | .       |                  |        |       |
|                                                                       | <i>per-wave</i> yes             | 0.013              | 0.850   |                  |        |       |
|                                                                       | <i>post-wave</i> no             | -                  | .       |                  |        |       |
|                                                                       | <i>post-wave</i> yes            | 0.210              | 0.014   |                  |        |       |
|                                                                       | FMC                             |                    |         | MICU (ref : EU ) | -0.369 | 0.027 |
|                                                                       | <i>interaction period x FMC</i> | <i>pre-wave</i> EU | -       | .                |        |       |
| <i>pre-wave</i> MICU                                                  |                                 | -                  | .       |                  |        |       |
| <i>per-wave</i> EU                                                    |                                 | -                  | .       |                  |        |       |
| <i>per-wave</i> MICU                                                  |                                 | 0.138              | 0.536   |                  |        |       |
| <i>post-wave</i> EU                                                   |                                 | -                  | .       |                  |        |       |
| <i>post-wave</i> MICU                                                 |                                 | 0.008              | 0.968   |                  |        |       |

Results of multivariate linear regression mixed model; variable to be explained:  $Y = \log$  (EU admission-to-imaging time); results adjusted on period, age, gender, urbanicity, FDep15, APL MG 18, residence-EU distance, presence of stroke unit, MRI 24 hours a day, presence of interventional neuroradiology unit, care during on-call activity, mode of transport, calls to emergency services activity, mRS less than 1 before stroke, NIHSS at entry, previous stroke or transient ischaemic attack

APL MG 2018=potential accessibility indicator to general practitioners; EU=emergency unit; FDep15=deprivation index; FMC=first medical contact; MICU=mobile intensive care units; MRI=magnetic resonance imaging; mRS=modified Rankin Scale; NIHSS=National Institute of Health Stroke Score.

*Created by the authors*

**Results of the final model estimating the association between reorganisations and use of care effects on care management times: p-value of the type III global fixed effects test - STEMI cohort (N=1843)**

| Variable                                                              | p-value |
|-----------------------------------------------------------------------|---------|
| <b>Hospital reorganisations</b>                                       |         |
| Increase in the telephone reception capacities                        | 0.273   |
| Restriction of helicopter transport for COVID-19 patients             | 0.637   |
| <i>Plan blanc</i>                                                     | 0.077   |
| Systematic COVID-19 testing                                           | 0.013   |
| Separate COVID-19/non-COVID-19 patients pathway                       | 0.395   |
| Decrease in non-COVID-19 patients management and admission capacities | 0.135   |
| Coronary angiography room dedicated to COVID-19 patients in cathlabs  | 0.907   |
| Deprogramming of non-urgent procedures or hospitalisations            | 0.134   |
| Decrease in bed capacity for non-COVID-19 patients                    | 0.557   |
| <b>Use of care</b>                                                    |         |
| FMC                                                                   | <0.001  |
| Interaction period x FMC                                              | 0.492   |
| Symptoms-to-care time (10 min step)                                   | <0.001  |
| Interaction period x symptoms-to-care time                            | 0.206   |

Results of a multivariate linear regression mixed model; variable to be explained:  $Y = \log(\text{FMC-to-procedure time})$ ; results adjusted on period, age, gender, urbanicity, FDep15, APL MG 18, residence-to-cathlab distance, cathlab hospital status, care during on-call activity, mode of transport, calls to emergency services activity, FMC-to-cathlab distance, diabetes mellitus, coronary artery disease or STEMI history).

APL MG 2018=potential accessibility indicator to general practitioners; EU=emergency unit;

FDep15=deprivation index; FMC=first medical contact; STEMI=segment elevation myocardial infarction.

*Created by the authors*

**Results of the final model estimating the association between reorganisations and use of care effects on care management times: estimation of regression coefficients - STEMI cohort (N=1843)**

| Variable                                                              | Modalities               | $\beta$                   | p-value |       |
|-----------------------------------------------------------------------|--------------------------|---------------------------|---------|-------|
| Intercept                                                             |                          | 4.475                     | <0.001  |       |
| <b>Hospital reorganisations</b>                                       |                          |                           |         |       |
| Increase in the telephone reception capacities                        | yes (ref : no)           | 0.072                     | 0.273   |       |
| Restriction of helicopter transport for COVID-19 patients             | yes (ref : no)           | 0.034                     | 0.637   |       |
| <i>Plan blanc</i>                                                     | yes (ref : no)           | -0.212                    | 0.077   |       |
| Systematic COVID-19 testing                                           | yes (ref : no)           | 0.343                     | 0.013   |       |
| Separate COVID-19/non-COVID-19 patients pathway                       | yes (ref : no)           | -0.092                    | 0.395   |       |
| Decrease in non-COVID-19 patients management and admission capacities | yes (ref : no)           | -0.222                    | 0.135   |       |
| Coronary angiography room dedicated to COVID-19 patients in cathlabs  | yes (ref : no)           | -0.010                    | 0.907   |       |
| Deprogramming of non-urgent procedures or hospitalisations            | yes (ref : no)           | 0.131                     | 0.134   |       |
| Decrease in bed capacity for non-COVID-19 patients                    | yes (ref : no)           | -0.043                    | 0.557   |       |
| <b>Use of care</b>                                                    |                          |                           |         |       |
| FMC                                                                   | EU without cathlab (ref) | -                         | .       |       |
|                                                                       | MICU                     | -1.061                    | <0.001  |       |
|                                                                       | EU with cathlab          | -0.326                    | <0.001  |       |
| <i>interaction period x FMC</i>                                       | <i>pre-wave</i>          | <i>EU without cathlab</i> | -       |       |
|                                                                       | <i>pre-wave</i>          | <i>MICU</i>               | -       |       |
|                                                                       | <i>pre-wave</i>          | <i>EU with cathlab</i>    | -       |       |
|                                                                       | <i>per-wave</i>          | <i>EU without cathlab</i> | -       |       |
|                                                                       | <i>per-wave</i>          | <i>MICU</i>               | -0.094  | 0.419 |
|                                                                       | <i>per-wave</i>          | <i>EU with cathlab</i>    | 0.102   | 0.505 |
|                                                                       | <i>post-wave</i>         | <i>EU without cathlab</i> | -       |       |
|                                                                       | <i>post-wave</i>         | <i>MICU</i>               | 0.075   | 0.514 |
| Symptoms-to-care time (10 min step)                                   |                          | 0.221                     | 0.14    |       |
|                                                                       |                          | 0.002                     | 0.016   |       |
| <i>Interaction period x symptoms-to-care time</i>                     | <i>pre-wave (ref)</i>    | -                         |         |       |
|                                                                       | <i>per-wave</i>          | 0.003                     | 0.137   |       |
|                                                                       | <i>post-wave</i>         | 0.002                     | 0.209   |       |

Results of a multivariate linear regression mixed model; variable to be explained: Y=log (FMC-to-procedure time); results adjusted on period, age, gender, urbanicity, FDep15, APL MG 18, residence-to-cathlab distance, cathlab hospital status, care during on-call activity, mode of transport, calls to emergency services activity, FMC-to-cathlab distance, diabetes mellitus, coronary artery disease or STEMI history).

APL MG 2018=potential accessibility indicator to general practitioners; EU=emergency unit;

FDep15=deprivation index; FMC=first medical contact; MICU=mobile intensive care units; STEMI=segment elevation myocardial infarction.

Created by the authors

**Stroke cohort**

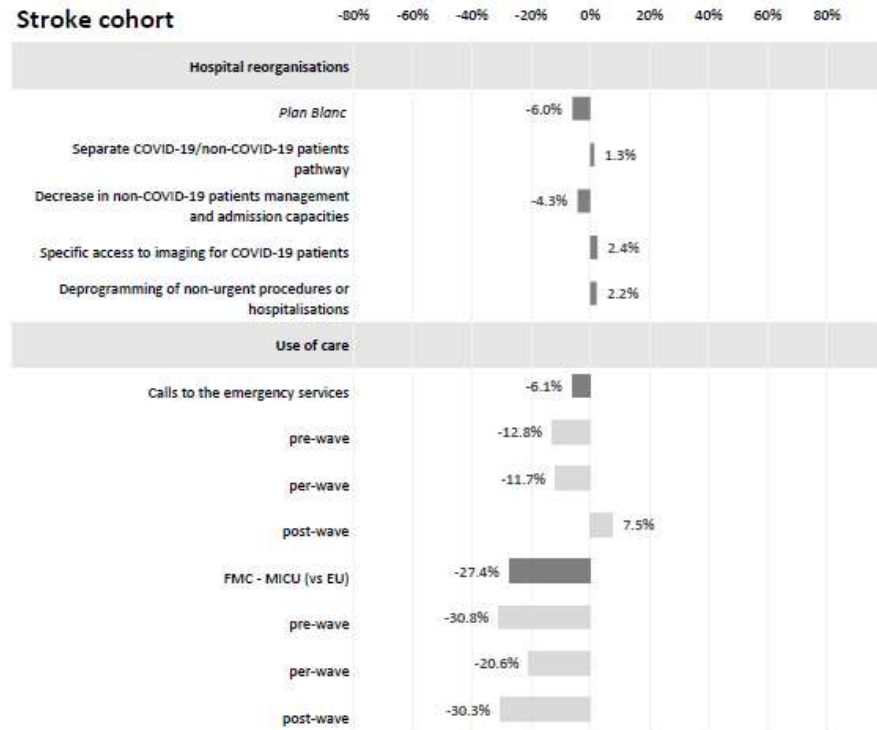

**STEMI cohort**

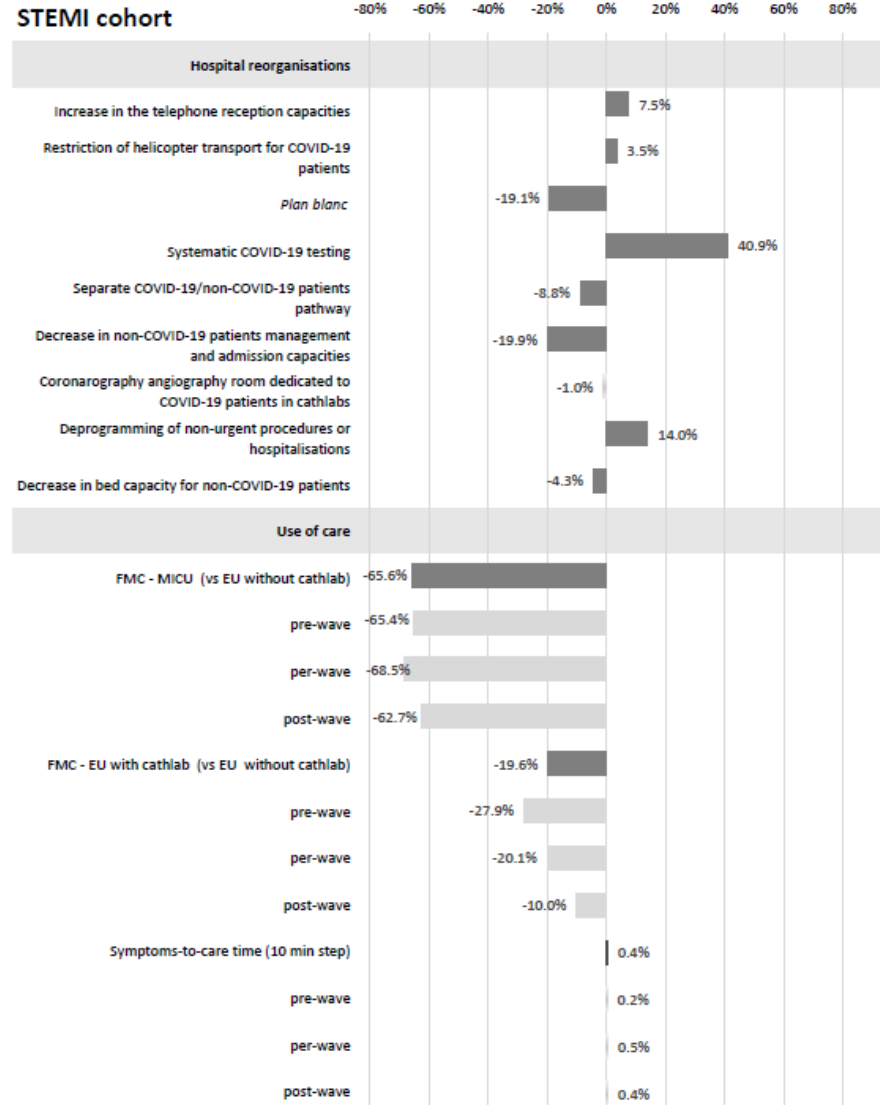

**Figure. Stroke and STEMI cohorts. Variation percentages of the estimations of the reorganisations and use of care effects on care management times**

**A: Stroke cohort (N=4603)** – Percentage change in overall effects; results of multivariate linear regression mixed models; variable to be explained:  $Y = \log$  (EU admission-to-imaging time); results adjusted on period, age, gender, urbanicity of residence, FDep15, APL MG 18, residence-EU distance, presence of stroke unit, MRI 24 hours a day, presence of interventional neuroradiology unit, care during on-call activity, mode of transport, calls to emergency services activity, mRS less than 1 before stroke, NIHSS at entry, previous stroke or transient ischaemic attack.

**B: STEMI cohort (N=1843)** – Percentage change in overall effects; results of multivariate linear regression mixed models; variable to be explained:  $Y = \log$  (FMC-to-procedure time); results adjusted on period, age, gender, urbanicity of residence, FDep15, APL MG 18, residence-to-cathlab distance, cathlab hospital status, care during on-call activity, mode of transport, calls to emergency services activity, FMC-to-cathlab distance, diabetes mellitus, coronary artery disease or STEMI history).

Light grey: interaction with the COVID-19 period, Dark grey: raw results without interaction with the COVID-19 period

*Created by the authors*
